# Supplementary material for: MetaBAT 2: an adaptive binning algorithm for robust and efficient genome reconstruction from metagenome assemblies
Source: PubMed Central journal article supplement (PMC6662567; doi:10.7717/peerj.7359), 2019-07-26
Supplement: peerj-07-7359-s002.pdf [file peerj-07-7359-s002.pdf]

**Table S2: List of parameter sets to evaluate MetaBAT2 on 120 real metagenome assem**

| <b>Parameter Set</b> | <b>Max Edges</b> | <b>MaxP</b> | <b>MinS</b> | <b>Better</b> | <b>Same</b> | <b>Worse</b> |    |
|----------------------|------------------|-------------|-------------|---------------|-------------|--------------|----|
| <b>S1</b>            | 2000             |             | 91          | 60            | 32          | 75           | 13 |
| <b>S2</b>            | 400              |             | 91          | 50            | 31          | 74           | 15 |
| <b>S3</b>            | 500              |             | 91          | 80            | 31          | 75           | 14 |
| <b>S4</b>            | 200              |             | 91          | 60            | 31          | 77           | 12 |
| <b>S5</b>            | 200              |             | 98          | 60            | 13          | 88           | 19 |
| <b>S6</b>            | 2000             |             | 95          | 60            | 7           | 105          | 8  |
| <b>S7</b>            | 10000            |             | 95          | 60            | 6           | 106          | 8  |
| <b>S8</b>            | 400              |             | 95          | 60            | 5           | 107          | 8  |
| <b>S9</b>            | 3000             |             | 95          | 60            | 5           | 107          | 8  |
| <b>Default</b>       | 200              |             | 95          | 60            |             |              |    |

## **nblies**

### **Total**

120  
120  
120  
120  
120  
120  
120  
120  
120  
120
