# Supplementary material for: MetaBAT 2: an adaptive binning algorithm for robust and efficient genome reconstruction from metagenome assemblies
Source: PeerJ. 2019 Jul 26;7:e7359. doi: 10.7717/peerj.7359 (PMC6662567; doi:10.7717/peerj.7359)
Supplement: Supplemental Information 3 [file peerj-07-7359-s003.xlsx]

## Sheet: Dataset_Summary
Datasets producing less than 5 bins	Binning failed		Keys for job completion status
1026852	1091645		CB	Completed with bins
1062778	1056082		CNB	Completed w/o bins
1062784	1018181		F	Failed, most likely timed out or ran out of memory
1062781	1010601
1063485	1010598
1066088	1035246
1102112	1010514
1066080	1010631
1102103	1010502
1095360	1095020
1062782	1010529
	1018247
	1029462
	1016235
	1018178
	1018250
	1018220
	1018175
	1018217
	1018238
	1040244
	1040373
	1040268
	1018241
	1040307
	1040415
	1040394
	1040370
	1040328
	1040289
	1040418
	1040391
	1050172
	1012991
	1012946
	1012892

## Sheet: Analysis_Summary
Binsanity	Run classification	# bins	>95% compl < 5% cont	>70% compl < 5% cont	>50% compl < 5% cont	MaxBin	Run classification	# bins	>95% compl < 5% cont	>70% compl < 5% cont	>50% compl < 5% cont	MyCC	Run classification	# bins	>95% compl < 5% cont	>70% compl < 5% cont	>50% compl < 5% cont	Concoct	Run classification	# bins	>95% compl < 5% cont	>70% compl < 5% cont	>50% compl < 5% cont	MetaBAT	Run classification	# bins	>95% compl < 5% cont	>70% compl < 5% cont	>50% compl < 5% cont	COCACOLA	Run classification	# bins	>95% compl < 5% cont	>70% compl < 5% cont	>50% compl < 5% cont
1000607	F	0	0	0	0	1000607	F	0	0	0	0	1000607	F	0	0	0	0	1000607	F	0	0	0	0	1000607	CB	75	7	17	20	1000607	F	0	0	0	0
1010336	F	0	0	0	0	1010336	CB	69	9	14	15	1010336	CB	77	11	20	21	1010336	CB	0	0	0	0	1010336	CB	51	15	20	22	1010336	CB	72	0	0	0
1021939	CB	7	0	0	0	1021939	CB	29	3	6	6	1021939	CB	33	4	5	7	1021939	CB	55	3	6	7	1021939	CB	20	3	9	10	1021939	CB	26	0	0	0
1041346	F	0	0	0	0	1041346	F	0	0	0	0	1041346	F	0	0	0	0	1041346	F	0	0	0	0	1041346	CB	104	2	20	27	1041346	F	0	0	0	0
1049274	F	0	0	0	0	1049274	CB	10	2	4	4	1049274	CB	1065	0	1	1	1049274	CB	149	0	1	1	1049274	CB	8	0	2	2	1049274	CB	7	0	0	0
1061688	CB	8	1	1	1	1061688	CB	17	2	6	6	1061688	CB	34	2	4	5	1061688	CB	43	0	2	2	1061688	CB	16	5	8	8	1061688	CB	18	0	0	0
1064129	F	0	0	0	0	1064129	CB	66	0	0	1	1064129	F	0	0	0	0	1064129	CB	66	0	0	1	1064129	CB	44	6	13	16	1064129	CB	55	0	0	0
1091231	F	0	0	0	0	1091231	F	0	0	0	0	1091231	F	0	0	0	0	1091231	F	0	0	0	0	1091231	CB	88	12	31	35	1091231	F	0	0	0	0
1104152	F	0	0	0	0	1104152	CB	28	4	4	4	1104152	CB	0	0	0	0	1104152	CB	60	0	0	0	1104152	CB	10	3	4	4	1104152	CB	24	0	0	0
1000652	CB	119	0	0	0	1000652	CB	13	0	0	0	1000652	CB	29	0	0	0	1000652	CB	26	0	0	1	1000652	CB	2	0	0	0	1000652	CB	8	0	0	0
1013404	CB	5	2	2	2	1013404	CB	10	5	7	8	1013404	CB	31	4	7	8	1013404	CB	27	3	3	5	1013404	CB	9	1	4	4	1013404	CB	12	0	0	0
1021953	F	0	0	0	0	1021953	CB	9	2	4	4	1021953	F	0	0	0	0	1021953	CB	209	0	2	2	1021953	CB	7	0	1	3	1021953	CB	7	0	0	0
1045045	CB	7	1	1	1	1045045	CB	15	7	7	7	1045045	CB	52	7	9	10	1045045	CB	19	1	1	2	1045045	CB	17	9	10	11	1045045	CB	17	1	2	2
1049298	F	0	0	0	0	1049298	CB	3	1	2	2	1049298	F	0	0	0	0	1049298	CB	129	1	3	3	1049298	CB	4	2	2	3	1049298	F	0	0	0	0
1061692	CB	5	0	0	1	1061692	CB	11	3	6	6	1061692	CB	29	2	6	6	1061692	CB	31	0	0	1	1061692	CB	8	3	4	4	1061692	CB	12	0	0	0
1064219	F	0	0	0	0	1064219	F	0	0	0	0	1064219	F	0	0	0	0	1064219	F	0	0	0	0	1064219	CB	10	0	0	1	1064219	F	0	0	0	0
1091232	F	0	0	0	0	1091232	F	0	0	0	0	1091232	F	0	0	0	0	1091232	F	0	0	0	0	1091232	CB	109	5	18	25	1091232	F	0	0	0	0
1104156	F	0	0	0	0	1104156	CB	20	3	3	3	1104156	CB	0	0	0	0	1104156	CB	52	0	0	1	1104156	CB	13	2	3	5	1104156	CB	23	0	0	0
1001465	F	0	0	0	0	1001465	F	0	0	0	0	1001465	F	0	0	0	0	1001465	F	0	0	0	0	1001465	CB	122	2	36	60	1001465	F	0	0	0	0
1021962	F	0	0	0	0	1021962	CB	10	1	4	4	1021962	F	0	0	0	0	1021962	CB	200	0	1	1	1021962	CB	6	2	3	4	1021962	CB	7	0	0	0
1045048	CB	5	0	0	0	1045048	CB	12	5	6	6	1045048	CB	29	3	3	3	1045048	CB	18	1	1	1	1045048	CB	14	2	3	3	1045048	CB	13	0	0	0
1049301	F	0	0	0	0	1049301	CB	6	3	4	4	1049301	F	0	0	0	0	1049301	CB	185	1	2	2	1049301	CB	5	1	1	2	1049301	CB	6	1	1	1
1061693	CB	5	1	1	1	1061693	CB	11	4	7	8	1061693	CB	34	2	6	6	1061693	CB	32	0	0	1	1061693	CB	8	3	5	5	1061693	CB	12	0	0	0
1066080	F	0	0	0	0	1066080	F	0	0	0	0	1066080	F	0	0	0	0	1066080	F	0	0	0	0	1066080	CB	20	0	2	2	1066080	F	0	0	0	0
1091682	F	1	0	0	0	1091682	CB	2	1	1	1	1091682	CNB	0	0	0	0	1091682	CB	2	0	0	0	1091682	CB	3	2	2	3	1091682	CB	2	0	0	0
1104464	F	0	0	0	0	1104464	CB	122	2	16	18	1104464	CNB	0	0	0	0	1104464	CB	204	0	9	20	1104464	CB	86	4	22	32	1104464	CB	96	0	0	0
1001468	F	0	0	0	0	1001468	F	0	0	0	0	1001468	F	0	0	0	0	1001468	F	0	0	0	0	1001468	CB	99	3	25	47	1001468	F	0	0	0	0
1016497	F	0	0	0	0	1016497	F	0	0	0	0	1016497	F	0	0	0	0	1016497	F	0	0	0	0	1016497	CB	21	1	4	4	1016497	F	0	0	0	0
1022553	CB	4	2	3	3	1022553	CB	4	2	3	3	1022553	CB	36	2	2	3	1022553	CB	22	0	1	1	1022553	CB	3	0	0	0	1022553	CB	6	0	0	0
1045051	CB	7	0	0	0	1045051	CB	18	4	6	6	1045051	CB	20	1	2	2	1045051	CB	23	1	4	4	1045051	CB	15	3	5	6	1045051	CB	20	0	0	0
1049376	CB	1182	0	0	0	1049376	CB	48	8	9	10	1049376	CB	51	2	4	4	1049376	CB	53	2	6	6	1049376	CB	17	3	4	7	1049376	CB	30	0	0	0
1061709	CB	6	0	0	0	1061709	CB	9	3	4	4	1061709	CB	52	2	2	2	1061709	CB	22	1	2	3	1061709	CB	8	3	3	3	1061709	CB	10	0	0	0
1066081	CB	522	0	0	0	1066081	CB	48	16	25	26	1066081	CB	0	0	0	0	1066081	CB	79	4	11	14	1066081	CB	39	9	25	27	1066081	F	0	0	0	0
1092161	CB	691	0	0	0	1092161	CB	31	1	2	2	1092161	CB	0	0	0	0	1092161	CB	53	2	2	2	1092161	CB	16	1	4	4	1092161	CB	26	0	0	0
1104465	F	0	0	0	0	1104465	CB	109	6	13	15	1104465	F	0	0	0	0	1104465	CB	212	3	12	21	1104465	CB	79	4	20	29	1104465	F	0	0	0	0
1001471	F	0	0	0	0	1001471	F	0	0	0	0	1001471	F	0	0	0	0	1001471	F	0	0	0	0	1001471	CB	110	2	25	44	1001471	F	0	0	0	0
1016500	F	0	0	0	0	1016500	F	0	0	0	0	1016500	F	0	0	0	0	1016500	F	0	0	0	0	1016500	CB	34	2	4	7	1016500	F	0	0	0	0
1024027	F	0	0	0	0	1024027	CB	246	10	36	56	1024027	F	0	0	0	0	1024027	CB	165	2	11	16	1024027	CB	94	4	20	36	1024027	CB	204	0	0	0
1045180	F	0	0	0	0	1045180	CB	4	0	0	0	1045180	F	0	0	0	0	1045180	F	0	0	0	0	1045180	CB	3	0	2	2	1045180	CB	5	0	1	1
1049379	F	0	0	0	0	1049379	CB	47	3	4	5	1049379	CB	48	1	2	4	1049379	CB	58	1	2	4	1049379	CB	22	2	2	3	1049379	CB	41	0	0	0
1061719	F	0	0	0	0	1061719	CB	96	3	17	23	1061719	CB	96	3	11	17	1061719	CB	170	7	21	27	1061719	CB	71	6	23	28	1061719	CB	73	0	0	0
1066082	CB	6	0	0	0	1066082	CB	57	10	22	22	1066082	CB	0	0	0	0	1066082	CB	83	2	13	15	1066082	CB	44	8	23	28	1066082	CB	55	0	1	2
1092165	CB	8	0	0	0	1092165	CB	14	0	2	2	1092165	CB	0	0	0	0	1092165	CB	52	0	3	3	1092165	CB	7	1	3	3	1092165	CB	14	0	0	0
1104467	F	0	0	0	0	1104467	CB	102	5	15	16	1104467	CNB	0	0	0	0	1104467	CB	204	7	20	22	1104467	CB	59	7	21	25	1104467	CB	90	0	0	0
1016600	CB	815	0	0	0	1016600	CB	25	0	0	1	1016600	CB	50	0	0	2	1016600	CB	31	0	1	2	1016600	CB	7	0	1	1	1016600	CB	20	0	0	0
1024981	F	0	0	0	0	1024981	CB	51	8	20	20	1024981	CB	73	4	15	18	1024981	CB	91	1	10	12	1024981	CB	24	1	11	13	1024981	CB	46	0	0	0
1045192	F	0	0	0	0	1045192	CB	4	1	3	3	1045192	CB	3420	0	2	2	1045192	CB	150	0	3	3	1045192	CB	5	0	2	2	1045192	F	0	0	0	0
1049388	CB	5	0	0	0	1049388	CB	38	4	6	7	1049388	CB	43	2	3	4	1049388	CB	39	2	2	3	1049388	CB	14	3	6	6	1049388	CB	35	0	0	0
1061840	F	0	0	0	0	1061840	CB	100	9	18	18	1061840	CB	96	5	10	11	1061840	CB	120	0	7	8	1061840	CB	60	10	25	25	1061840	CB	79	0	0	0
1066083	CB	6	0	0	0	1066083	CB	14	4	8	8	1066083	CB	0	0	0	0	1066083	CB	37	4	9	9	1066083	CB	12	1	5	5	1066083	CB	13	0	0	0
1092198	CB	1268	0	0	0	1092198	CB	45	1	2	2	1092198	CB	0	0	0	0	1092198	CB	79	2	4	6	1092198	CB	24	2	4	7	1092198	CB	37	0	0	0
1104480	F	0	0	0	0	1104480	CB	109	7	21	24	1104480	CNB	0	0	0	0	1104480	CB	183	4	16	25	1104480	CB	81	4	25	33	1104480	CB	103	0	0	0
1004517	CB	241	0	1	1	1004517	CB	13	0	1	1	1004517	CB	34	0	1	4	1004517	CB	25	0	3	4	1004517	CB	9	0	3	3	1004517	CB	21	0	0	0
1024987	F	0	0	0	0	1024987	CB	71	6	14	15	1024987	CB	71	0	11	13	1024987	CB	150	1	15	19	1024987	CB	34	2	13	16	1024987	CB	60	0	0	0
1045228	F	0	0	0	0	1045228	CB	6	1	2	2	1045228	CB	9	2	3	3	1045228	CB	0	0	0	0	1045228	CB	5	1	3	3	1045228	CB	5	0	0	0
1049391	CB	1135	1	1	1	1049391	CB	46	5	6	9	1049391	CB	47	3	6	6	1049391	CB	63	5	8	9	1049391	CB	36	9	13	17	1049391	CB	44	0	0	0
1061841	F	0	0	0	0	1061841	CB	76	10	18	22	1061841	CB	87	3	9	11	1061841	CB	110	1	9	13	1061841	CB	55	9	23	26	1061841	CB	72	0	0	0
1066084	F	0	0	0	0	1066084	CB	123	16	28	36	1066084	CB	0	0	0	0	1066084	CB	184	5	20	29	1066084	CB	92	12	29	39	1066084	F	109	0	0	0
1092933	F	0	0	0	0	1092933	CB	42	0	0	0	1092933	CB	0	0	0	0	1092933	CB	78	0	1	3	1092933	CB	16	0	1	2	1092933	CB	34	0	0	0
1104574	CB	932	1	1	1	1104574	CB	52	7	18	20	1104574	CB	0	0	0	0	1104574	CB	119	9	18	20	1104574	CB	48	6	22	28	1104574	CB	49	0	0	0
1004535	CB	1543	0	0	0	1004535	CB	28	1	3	3	1004535	CB	45	0	2	4	1004535	CB	44	0	3	6	1004535	CB	18	0	3	3	1004535	CB	24	0	0	0
1017775	CB	14	0	0	0	1017775	CB	18	0	0	0	1017775	CB	29	0	0	2	1017775	CB	59	0	0	2	1017775	CB	13	0	1	1	1017775	CB	11	0	0	0
1025707	F	0	0	0	0	1025707	F	0	0	0	0	1025707	F	0	0	0	0	1025707	F	0	0	0	0	1025707	CB	239	23	89	116	1025707	F	0	0	0	0
1045249	F	0	0	0	0	1045249	CB	5	1	3	3	1045249	CB	207	0	0	0	1045249	CB	0	0	0	0	1045249	CB	4	0	1	1	1045249	F	0	0	0	0
1049394	CB	1687	0	0	1	1049394	CB	42	6	6	8	1049394	CB	46	1	4	4	1049394	CB	73	2	6	7	1049394	CB	24	3	11	13	1049394	CB	34	0	0	0
1061842	F	0	0	0	0	1061842	CB	132	14	22	28	1061842	CB	0	0	0	0	1061842	CB	145	3	6	12	1061842	CB	80	10	24	28	1061842	CB	106	0	0	0
1066085	CB	1892	0	0	0	1066085	CB	68	18	27	28	1066085	CB	0	0	0	0	1066085	CB	106	6	17	21	1066085	CB	58	14	32	33	1066085	CB	66	1	1	1
1092937	F	0	0	0	0	1092937	CB	58	0	0	1	1092937	CB	0	0	0	0	1092937	CB	86	0	2	6	1092937	CB	16	0	0	0	1092937	CB	42	0	0	0
1105275	F	0	0	0	0	1105275	CB	49	0	0	1	1105275	CB	0	0	0	0	1105275	CB	64	0	0	1	1105275	CB	12	0	1	2	1105275	CB	38	0	0	0
1004649	CB	6	0	0	1	1004649	CB	20	0	1	2	1004649	CB	29	0	0	2	1004649	CB	36	0	1	4	1004649	CB	11	0	1	3	1004649	CB	15	0	0	0
1017781	F	0	0	0	0	1017781	CB	75	12	18	23	1017781	CB	73	10	22	24	1017781	CB	153	9	22	25	1017781	CB	54	10	23	26	1017781	F	0	0	0	0
1030626	F	0	0	0	0	1030626	CB	4	1	1	1	1030626	CB	143	2	2	2	1030626	CB	0	0	0	0	1030626	CB	7	2	2	2	1030626	F	0	0	0	0
1046603	F	0	0	0	0	1046603	F	0	0	0	0	1046603	F	0	0	0	0	1046603	F	0	0	0	0	1046603	CB	130	3	26	40	1046603	F	0	0	0	0
1049403	F	0	0	0	0	1049403	F	109	13	17	19	1049403	CNB	0	0	0	0	1049403	CB	131	7	18	20	1049403	CB	63	14	27	34	1049403	CB	98	0	0	0
1062777	F	0	0	0	0	1062777	F	0	0	0	0	1062777	F	0	0	0	0	1062777	F	0	0	0	0	1062777	CB	40	1	6	11	1062777	F	0	0	0	0
1066086	F	0	0	0	0	1066086	F	0	0	0	0	1066086	F	0	0	0	0	1066086	F	0	0	0	0	1066086	CB	89	9	18	30	1066086	F	0	0	0	0
1105508	F	0	0	0	0	1105508	CB	158	11	25	26	1105508	CNB	0	0	0	0	1105508	CB	206	6	22	30	1105508	CB	111	5	37	46	1105508	F	0	0	0	0
1009587	CB	187	0	0	0	1009587	CB	18	5	7	7	1009587	CB	32	1	2	3	1009587	CB	22	2	3	5	1009587	CB	17	6	9	9	1009587	CB	20	0	0	0
1019791	CB	1001	0	0	0	1019791	CB	63	7	10	12	1019791	CB	73	15	21	25	1019791	CB	97	3	9	11	1019791	CB	58	11	24	29	1019791	F	0	0	0	0
1033754	F	0	0	0	0	1033754	CB	97	1	3	4	1033754	F	0	0	0	0	1033754	CB	95	0	1	2	1033754	CB	33	1	1	2	1033754	CB	86	0	0	0
1047896	CB	3	0	0	0	1047896	CB	11	0	0	0	1047896	CB	20	0	0	0	1047896	CB	20	0	0	0	1047896	CB	6	1	1	1	1047896	CB	11	0	0	0
1056061	CB	10	0	0	0	1056061	CB	12	1	1	1	1056061	CB	52	0	1	1	1056061	CB	35	2	2	2	1056061	CB	4	1	2	2	1056061	CB	12	0	0	0
1062779	F	0	0	0	0	1062779	F	0	0	0	0	1062779	F	0	0	0	0	1062779	F	0	0	0	0	1062779	CB	33	1	2	3	1062779	F	0	0	0	0
1070358	F	0	0	0	0	1070358	CB	42	2	3	4	1070358	CB	0	0	0	0	1070358	CB	219	2	3	4	1070358	CB	34	2	6	8	1070358	CB	27	0	0	0
1093154	CB	13	0	0	0	1093154	CB	20	1	2	3	1093154	CB	0	0	0	0	1093154	CB	80	1	3	3	1093154	CB	18	0	1	3	1093154	CB	2	0	0	0
1009602	CB	307	1	1	1	1009602	CB	17	1	1	1	1009602	CB	22	1	2	2	1009602	CB	0	0	0	0	1009602	CB	17	5	8	9	1009602	CB	19	0	0	0
1020040	CB	696	0	0	0	1020040	CB	15	5	5	5	1020040	CB	20	0	0	1	1020040	CB	36	0	0	3	1020040	CB	14	6	6	6	1020040	CB	16	0	0	0
1035183	CB	231	0	0	0	1035183	CB	9	1	1	1	1035183	CB	14	0	0	2	1035183	CB	50	0	0	0	1035183	CB	7	0	0	2	1035183	CB	10	0	0	0
1047944	F	0	0	0	0	1047944	CB	60	4	4	6	1047944	CNB	0	0	0	0	1047944	CB	73	2	7	8	1047944	CB	26	1	6	10	1047944	CB	46	0	0	0
1056139	CB	7	0	0	0	1056139	CB	9	0	1	1	1056139	CB	51	0	1	2	1056139	CB	42	0	0	0	1056139	CB	4	0	0	1	1056139	CB	9	0	0	0
1063486	F	0	0	0	0	1063486	F	0	0	0	0	1063486	F	0	0	0	0	1063486	F	0	0	0	0	1063486	CB	43	4	9	12	1063486	F	0	0	0	0
1093505	F	0	0	0	0	1093505	CB	32	2	4	4	1093505	F	0	0	0	0	1093505	CB	86	1	4	4	1093505	CB	20	2	3	5	1093505	CB	20	0	0	0
1009614	CB	4	0	0	0	1009614	CB	10	4	5	5	1009614	CB	38	3	4	4	1009614	CB	21	6	6	6	1009614	CB	11	6	8	8	1009614	CB	12	0	0	0
1020097	CB	536	1	1	1	1020097	CB	6	3	3	3	1020097	CB	102	2	2	2	1020097	CB	44	1	2	2	1020097	CB	5	2	3	3	1020097	CB	6	0	0	0
1035423	CB	8	0	1	1	1035423	CB	15	0	1	1	1035423	CB	23	0	0	0	1035423	CB	77	1	1	1	1035423	CB	6	1	2	2	1035423	CB	10	0	0	0
1047947	F	0	0	0	0	1047947	CB	33	0	1	3	1047947	CB	43	0	1	2	1047947	CB	59	0	2	3	1047947	CB	15	0	2	3	1047947	F	0	0	0	0
1056184	CB	3	0	0	0	1056184	CB	6	2	3	3	1056184	CB	19	2	2	2	1056184	CB	24	0	1	1	1056184	CB	7	0	0	0	1056184	CB	7	0	0	0
1064126	F	0	0	0	0	1064126	CB	110	20	31	33	1064126	CB	0	0	0	0	1064126	CB	137	4	10	11	1064126	CB	62	6	19	25	1064126	CB	99	0	0	0
1074340	F	0	0	0	0	1074340	CB	54	0	0	2	1074340	CB	0	0	0	0	1074340	CB	124	0	0	0	1074340	CB	17	1	2	2	1074340	F	0	0	0	0
1095630	F	0	0	0	0	1095630	CB	27	1	1	1	1095630	CB	0	0	0	0	1095630	CB	67	0	0	0	1095630	CB	14	0	0	2	1095630	CB	21	0	0	0
1010297	CB	318	0	0	0	1010297	CB	13	4	5	6	1010297	CB	20	4	7	7	1010297	CB	24	2	5	6	1010297	CB	12	5	8	9	1010297	CB	14	0	0	0
1021909	CB	536	1	1	1	1021909	CB	6	3	3	3	1021909	CB	97	2	3	3	1021909	CB	44	1	2	2	1021909	CB	29	4	9	10	1021909	CB	6	0	0	0
1035438	CB	496	0	0	0	1035438	CB	20	1	2	3	1035438	CB	79	0	2	3	1035438	CB	123	0	2	3	1035438	CB	19	1	1	3	1035438	CB	17	0	0	0
1048537	CB	131	0	0	0	1048537	CB	18	0	2	2	1048537	CB	17	1	2	2	1048537	CB	31	3	4	4	1048537	CB	14	3	5	6	1048537	CB	17	0	0	0
1056202	CB	121	1	1	1	1056202	CB	15	5	6	7	1056202	CB	25	0	1	1	1056202	CB	38	1	1	2	1056202	CB	11	3	3	4	1056202	CB	14	0	0	0
1064127	F	0	0	0	0	1064127	F	0	0	0	0	1064127	F	0	0	0	0	1064127	F	0	0	0	0	1064127	CB	46	6	14	19	1064127	F	0	0	0	0
1074528	F	0	0	0	0	1074528	F	0	0	0	0	1074528	F	0	0	0	0	1074528	F	0	0	0	0	1074528	CB	17	0	0	0	1074528	F	0	0	0	0
1104138	CB	6	0	0	0	1104138	CB	21	4	6	6	1104138	CB	0	0	0	0	1104138	CB	51	0	1	3	1104138	CB	16	2	4	4	1104138	CB	17	0	0	0
1010309	CB	670	0	0	0	1010309	CB	22	6	8	8	1010309	CB	27	4	6	7	1010309	CB	30	0	3	5	1010309	CB	18	5	7	7	1010309	CB	23	0	0	0
1021936	CB	7	0	0	0	1021936	CB	17	4	6	6	1021936	CB	27	4	8	10	1021936	CB	31	1	4	4	1021936	CB	10	4	6	6	1021936	CB	17	0	0	0
1039713	F	0	0	0	0	1039713	CB	91	4	7	7	1039713	CNB	0	0	0	0	1039713	CB	129	1	2	2	1039713	CB	21	2	5	5	1039713	CB	61	0	0	0
1048555	CB	6	0	1	2	1048555	CB	11	6	6	7	1048555	CB	40	4	5	5	1048555	CB	33	1	1	2	1048555	CB	10	6	6	6	1048555	CB	12	0	0	1
1060143	CB	7	0	0	0	1060143	CB	18	5	6	6	1060143	CB	34	2	7	8	1060143	CB	34	6	7	8	1060143	CB	14	9	11	12	1060143	CB	19	2	3	3
1064128	F	0	0	0	0	1064128	F	0	0	0	0	1064128	F	0	0	0	0	1064128	F	0	0	0	0	1064128	CB	45	4	9	11	1064128	F	0	0	0	0
1091229	F	0	0	0	0	1091229	F	0	0	0	0	1091229	F	0	0	0	0	1091229	F	0	0	0	0	1091229	CB	96	8	30	34	1091229	F	0	0	0	0
1104146	F	0	0	0	0	1104146	CB	35	2	3	4	1104146	CB	0	0	0	0	1104146	CB	66	0	1	3	1104146	CB	20	0	4	8	1104146	CB	26	0	0	0
