# Supplementary material for: 山口大学公開講座によるコムギ栽培からパンづくりまでの一貫した理解の促進と山口県産100%小麦粉の試験販売へのとりくみ(日本作物学会中国支部講演会)
Source: PeerJ journal article supplement (doi:10.7717/peerj.7359), 2007-07-26
Supplement: Supplemental_Table_S1.pdf [file Supplemental_Table_S1.pdf]

**Table S1: A list of metagenome assemblies used to evaluate binning performance**

| <b>AssessionID</b> | <b>Sample Name</b>                                                       |
|--------------------|--------------------------------------------------------------------------|
| 1000607            | Alkali sediment microbial communities from Soda Lake, CA                 |
| 1010336            | Marine cyanobacterial communities from Panama                            |
| 1021939            | Serpentinite rock and fluid subsurface biosphere microbial               |
| 1041346            | Freshwater lake sediment microbial communities from the University       |
| 1049274            | Marine gutless worms symbiont microbial communities from Max Planck      |
| 1061688            | Cellulose-adapted microbial communities from the Joint BioEnergy         |
| 1064129            | Surface soil microbial communities from Centralia Pennsylvania           |
| 1091231            | Freshwater microbial communities from Lake Fryxell liftoff mats          |
| 1104152            | Peatland microbial communities from Minnesota, USA, analyzing carbon     |
| 1000652            | Forest soil microbial communities from El Dorado National                |
| 1013404            | Cellulose adapted compost microbial communities from Newby               |
| 1021953            | Olavius algarvensis symbiont microbial communities from Tuscany          |
| 1045045            | FECB-22 metaG                                                            |
| 1049298            | Marine gutless worms symbiont microbial communities from Max Planck      |
| 1061692            | Cellulose-adapted microbial communities from the Joint BioEnergy         |
| 1064219            | Warmed soil microbial communities from the Hubbard Brook experimental    |
| 1091232            | Freshwater microbial communities from Lake Bonney liftoff mats           |
| 1104156            | Peatland microbial communities from Minnesota, USA, analyzing carbon     |
| 1001465            | Subsurface groundwater microbial communities from S. Glens               |
| 1015567            | Wetland sediment microbial communities from Twitchell Island             |
| 1021962            | Olavius algarvensis symbiont microbial communities from Tuscany          |
| 1045048            | FECB-24 metaG                                                            |
| 1049301            | Marine gutless worms symbiont microbial communities from Max Planck      |
| 1061693            | Cellulose-adapted microbial communities from the Joint BioEnergy         |
| 1066080            | Iron sulfur acid spring bacterial and archeal communities from Banff     |
| 1091682            | Rumen microbial communities from New Zealand - Rumen Methanol Enrichment |
| 1104464            | Active sludge microbial communities of municipal wastewater-treating     |
| 1001468            | Subsurface groundwater microbial communities from S. Glens               |
| 1016497            | Nasutitermes corniger P1 segment microbial communities                   |
| 1022553            | Hot spring thermophilic microbial communities from Obsidian              |
| 1045051            | FECB-27 metaG                                                            |
| 1049376            | Wastewater treatment Type I Accumulibacter community                     |
| 1061709            | Cellulose-adapted microbial communities from the Joint BioEnergy         |
| 1066081            | Hot spring sediment bacterial and archeal communities from British       |
| 1092161            | Estuarine microbial communities from the Columbia River estuary          |
| 1104465            | Active sludge microbial communities of municipal wastewater-treating     |
| 1001471            | Subsurface groundwater microbial communities from S. Glens               |
| 1016500            | Nasutitermes corniger P3 segment microbial communities                   |
| 1024027            | Soil microbial communities from Rifle Colorado, Rifle Oxygen_injection   |
| 1045180            | Worm MetaG Olavius albidus HERON ISLAND.1                                |
| 1049379            | Wastewater treatment Type I Accumulibacter community                     |
| 1061719            | Anoxygenic and chlorotrophic microbial mat microbial communities         |

1066082 Hot spring sediment bacterial and archeal communities  
1092165 Estuarine microbial communities from the Columbia River estuary  
1104467 Active sludge microbial communities of municipal wastewater-treating  
1004322 Freshwater microbial communities from Lake Mendota WI  
1016600 Arctic peat soil from Barrow, Alaska - NGEE Surface sample  
1024981 Host-associated microbial community of the marine sponge  
1045192 Worm MetaG *Olavius imperfectus* BELIZE.2  
1049388 Wastewater treatment Type I *Accumulibacter* community  
1061840 Enrichment culture microbial communities from Arthur Kill intertidal  
1066083 Hot spring sediment bacterial and archeal communities  
1092198 Estuarine microbial communities from the Columbia River estuary  
1104480 Active sludge microbial communities of municipal wastewater-treating  
1004517 Marine microbial communities from the Deep Pacific Ocean  
1017313 Freshwater microbial communities from Lake Mendota, WI  
1024987 Host-associated microbial community of the marine sponge  
1045228 Worm MetaG *Olavius ullae* BAHAMAS.2  
1049391 Wastewater treatment Type I *Accumulibacter* community  
1061841 Enrichment culture microbial communities om Arthur Kill intertidal  
1066084 Hot spring sediment bacterial and archeal communities  
1092933 Freshwater sediment microbial communities from Prairie Pothole Lake  
1104574 Hot spring microbial communities from South Africa to study Microbial  
1004535 Marine microbial communities from the Deep Pacific Ocean  
1017775 Hypersaline microbial mat communities from Conch Spring  
1025707 Hot spring thermophilic microbial communities from Obsidian  
1045249 Worm MetaG *Olavius geniculatus* LIZARD ISLAND  
1049394 Wastewater treatment Type I *Accumulibacter* community  
1061842 Enrichment culture microbial communities from rom New York Harbor  
1066085 Hot spring sediment bacterial and archeal communities from British  
1092937 Freshwater sediment microbial communities from Prairie Pothole Lake  
1105275 Peat soil microbial communities from Weissenstadt, Germany - Sb\_50d\_b\_LC  
1004649 Marine microbial communities from the Deep Atlantic Ocean  
1017781 Hypersaline microbial mat communities from Yellowstone National  
1030626 Marine viral communities from the Pacific Ocean - ETNP\_2\_1000  
1046603 Crystal Geyser 4/9/14 3 um filter  
1049403 Wastewater treatment Type I *Accumulibacter* community  
1062777 Switchgrass rhizosphere microbial communities from Kellogg Biological  
1066086 Hot spring sediment bacterial and archeal communities from British  
1093094 Active sludge microbial communities from wastewater in Klosterneuburg  
1105508 Anaerobic biogas reactor microbial communitas from Washington, USA  
1009587 Aerobic enrichment media from Bioluminiscent Bay, La Parguera  
1019791 Biofuel bioreactor microbial communities from Berkeley, California  
1033754 Grasslands soil microbial communities from the Angelo Coastal  
1047896 Wetland microbial communities from the San Francisco Bay  
1056061 Freshwater sediment methanotrophic microbial communities  
1062779 Switchgrass rhizosphere microbial communities from Kellogg Biological

1070358 Saline lake microbial communities from Ace Lake, Antarctica-Antarctic  
1093154 Extremophilic microbial mat communities from Yellowstone National  
1009602 Aerobic enrichment media from Bioluminescent Bay, La Parguera  
1020040 Marine viral communities from the Deep Pacific Ocean - MSP-121  
1035183 Freshwater microbial communities from Crystal Bog, Wisconsin  
1047944 Wetland microbial communities from San Francisco Bay, California  
1056139 Freshwater sediment methanotrophic microbial communities  
1063486 Switchgrass rhizosphere microbial communities from Kellogg Biological  
1073292 Marine eukaryotic communities from Monterey Bay, USA  
1093505 Marine viral communities from the Global Malaspina Expedition  
1009614 Tt an M2 anaerobic enrichment on miscanthus from sediment  
1020097 Marine viral communities from the Pacific Ocean - LP-38  
1035423 Freshwater microbial communities from Crystal Bog, Wisconsin, USA  
1047947 Wetland microbial communities from San Francisco Bay, California  
1056184 Freshwater sediment methanotrophic microbial communities  
1064126 Surface soil microbial communities from Centralia Pennsylvania  
1074340 Aqueous microbial communities from the Delaware River and Bay  
1095630 Groundwater sediment microbial communities from an aquifer  
1010297 Tt ae E1 feedstock associated aerobic enrichment on eucalyptus  
1021909 Serpentinite rock and fluid subsurface biosphere microbial  
1035438 Freshwater microbial communities from Crystal Bog, Wisconsin  
1048537 Arabidopsis plate scrape CL\_Col\_mLB\_r2  
1056202 Freshwater sediment methanotrophic microbial communities  
1064127 Surface soil microbial communities from Centralia Pennsylvania  
1074528 Arctic peat soil microbial communities from the Barrow Environmental  
1104138 Peatland microbial communities from Minnesota, USA, analyzing carbon  
1010309 Tt ae P1 feedstock associated aerobic enrichment on pine  
1021936 Serpentinite rock and fluid subsurface biosphere microbial  
1039713 Marine microbial communities from expanding oxygen minimum  
1048555 Arabidopsis plate scrape CL\_Cvi\_mLB\_r2  
1060143 Cellulose-adapted microbial communities from the Joint BioEnergy  
1064128 Surface soil microbial communities from Centralia Pennsylvania  
1091229 Freshwater microbial communities from Lake Fryxell littoral mats  
1104146 Peatland microbial communities from Minnesota, USA, analyzing carbon
